# Supplementary material for: Yolk–shelled LiNi0.6Co0.2Mn0.2O2 cathode for high-performance lithium ion batteries: a general synthetic strategy
Source: Royal Society of Chemistry journal article supplement (doi:10.1039/d2ma00943a), 2022-11-23
Supplement: d2ma00943a1.pdf [file d2ma00943a1.pdf]

## Supporting Information

### Yolk-Shelled $\text{LiNi}_{0.6}\text{Co}_{0.2}\text{Mn}_{0.2}\text{O}_2$ Cathode for High-Performance Lithium Ion Batteries : A General Synthetic Strategy

Ang Gao, Tianhao Yao, Menglong Yao, Ruochen Chen, Qiangrui He, Hongkang Wang\*

State Key Lab of Electrical Insulation and Power Equipment, Center of Nanomaterials for Renewable Energy (CNRE), School of Electrical Engineering, Xi'an Jiaotong University, Xi'an 710049, PR China.

\* Corresponding Author. E-mail: [hongkang.wang@mail.xjtu.edu.cn](mailto:hongkang.wang@mail.xjtu.edu.cn)

## Experimental Section

**Materials synthesis.** The nickel cobalt manganese complex was synthesized using the solvothermal method. Firstly, a stoichiometric amount of  $\text{Ni}(\text{NO}_3)_2 \cdot 6\text{H}_2\text{O}$ ,  $\text{Co}(\text{NO}_3)_2 \cdot 6\text{H}_2\text{O}$  and  $\text{Mn}(\text{NO}_3)_2 \cdot 4\text{H}_2\text{O}$  were dissolved in 60 ml isopropanol solution, and magnetic stirring was carried out for about 30 minutes to form a transparent and clear solution. After dissolving 0.9 g anhydrous glucose, the transparent solution is stirred for about 20 minutes. The obtained solution was transferred to the 100 mL Teflon-lined stainless-steel autoclave and heated to 180 °C for 12 h at 300 rpm. The product collected by centrifugation and washing for 3 times was dried in an oven with a temperature of 60 °C overnight. The product was named as NCMC. The product was sintered in a muffle furnace, slowly heated to 600 °C at a heating rate of 2 °C /min in air atmosphere for 2 h, and then cooled naturally to obtain nickel cobalt manganese oxide (NCMO). Lithium carbonate and nickel cobalt manganese oxide (NCMO) are weighed respectively and mixed according to a certain molar ratio ( $\text{Li}_2\text{CO}_3$  : NCMO = 0.625 : 1). Then 100  $\mu\text{l}$  polyvinyl alcohol aqueous solution with the concentration of 2 g L<sup>-1</sup> is added to fully mix them. After grinding for 20 minutes, the samples were pre-sintered at 480 °C at the rate of 2 °C/min for 5 h in oxygen atmosphere.  $\text{LiNi}_{0.6}\text{Co}_{0.2}\text{Mn}_{0.2}\text{O}_2$  materials was obtained by calcining at different temperatures for 15 hours under oxygen atmosphere.  $\text{LiNi}_{0.6}\text{Co}_{0.2}\text{Mn}_{0.2}\text{O}_2$  materials with different temperatures (730, 780, and 830 °C) were marked NCM622-P2-730, NCM622-P2-780 and NCM622-P2-830. For comparison purposes, samples marked as NCM622-P0-780 was prepared by the same procedure with 100  $\mu\text{l}$  deionized water and sintering temperature of 780 °C.

**Structural characterization.** The microstructures of the products were characterized

by scanning electron microscopy (SEM, FEI, Quanta 250F) and (high-resolution) transmission electron microscopy ((HR)TEM, Thermo Fisher, Talos F200X). The phase structures of the products were characterized by X-ray diffraction (XRD) under Cu K $\alpha$  radiation ( $k = 1.5418 \text{ \AA}$ ) at 30 kV and 10 mA in the  $2\theta$  range of 10-80°. The elemental composition and chemical state of the products were analyzed by X-ray photoelectron spectroscopy (XPS) using an ESCALAB Xi+ Thermo Fisher XPS instrument.

**Electrochemical measurements.** The electrochemical properties of LiNi<sub>0.6</sub>Co<sub>0.2</sub>Mn<sub>0.2</sub>O<sub>2</sub> were investigated in CR2025 coin-type half-cells. Firstly, the working electrodes were fabricated by casting a slurry on the aluminum foil, and the slurry was prepared by mixing the active materials (LiNi<sub>0.6</sub>Co<sub>0.2</sub>Mn<sub>0.2</sub>O<sub>2</sub>), conductive carbon black (ECP-600JD) and polyvinylidene fluoride (PVDF, HSV900, Arkema) with the weight ratio of 8:1:1 and 1-methyl-2-pyrrolidinone (NMP, C<sub>5</sub>H<sub>9</sub>NO99.5%, Macklin) as a solvent. The slurry coated aluminum foils were then dried under vacuum at 60 °C for 12 h. The working electrodes were punched into round sheets with a diameter of 14 mm, and the loading amount of the active material was about 1.8 mg cm<sup>-2</sup>. LIB cells were assembled in Ar-filled glove box (H<sub>2</sub>O < 0.1 ppm, O<sub>2</sub> < 0.1 ppm). For lithium ion half cells, the aluminum foils were used as the counter electrodes, and the Celgard 2400 as the separators. 1M LiPF<sub>6</sub> in EC/DEC (1:1 in volume) was used as the electrolyte. The galvanostatic discharge-charge tests of LIBs were performed on a battery test system (Neware BTS, China).

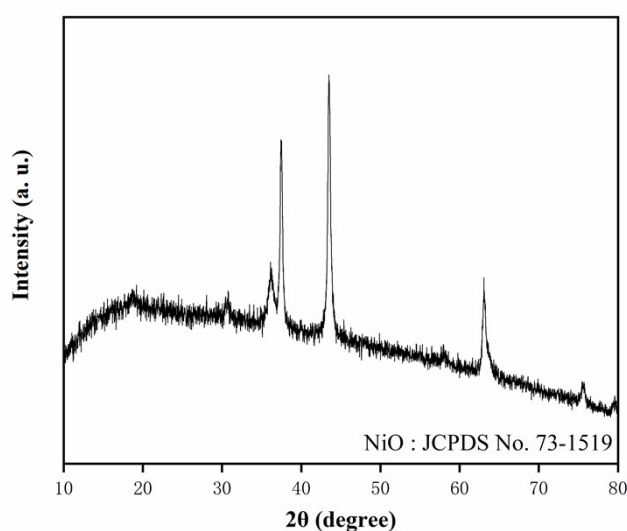

**Fig. S1.** XRD pattern of the NCMO.

**Table S1.** The ICP result of NCM622-P2-780.

| Elements     | Li   | Ni   | Co   | Mn   |
|--------------|------|------|------|------|
| Atomic ratio | 2.94 | 1.55 | 0.55 | 0.57 |

**Table S2.** Lattice parameters of different NCM622 products.

| Sample        | c (Å)  | c (Å)   | c/a  | I <sub>(003)</sub> /I <sub>(104)</sub> |
|---------------|--------|---------|------|----------------------------------------|
| NCM622-P0-780 | 2.8650 | 14.0759 | 4.91 | 1.57                                   |
| NCM622-P2-730 | 2.8559 | 14.0434 | 4.92 | 1.67                                   |
| NCM622-P2-780 | 2.8568 | 14.0460 | 4.92 | 1.81                                   |
| NCM622-P2-830 | 2.8655 | 14.0583 | 4.91 | 1.77                                   |

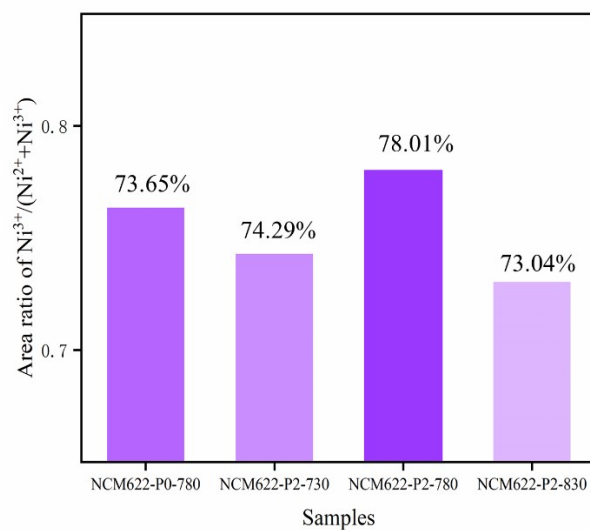

**Fig. S2.** Area ratios of Ni<sup>3+</sup>/(Ni<sup>2+</sup>+Ni<sup>3+</sup>) of different NCM622 products.

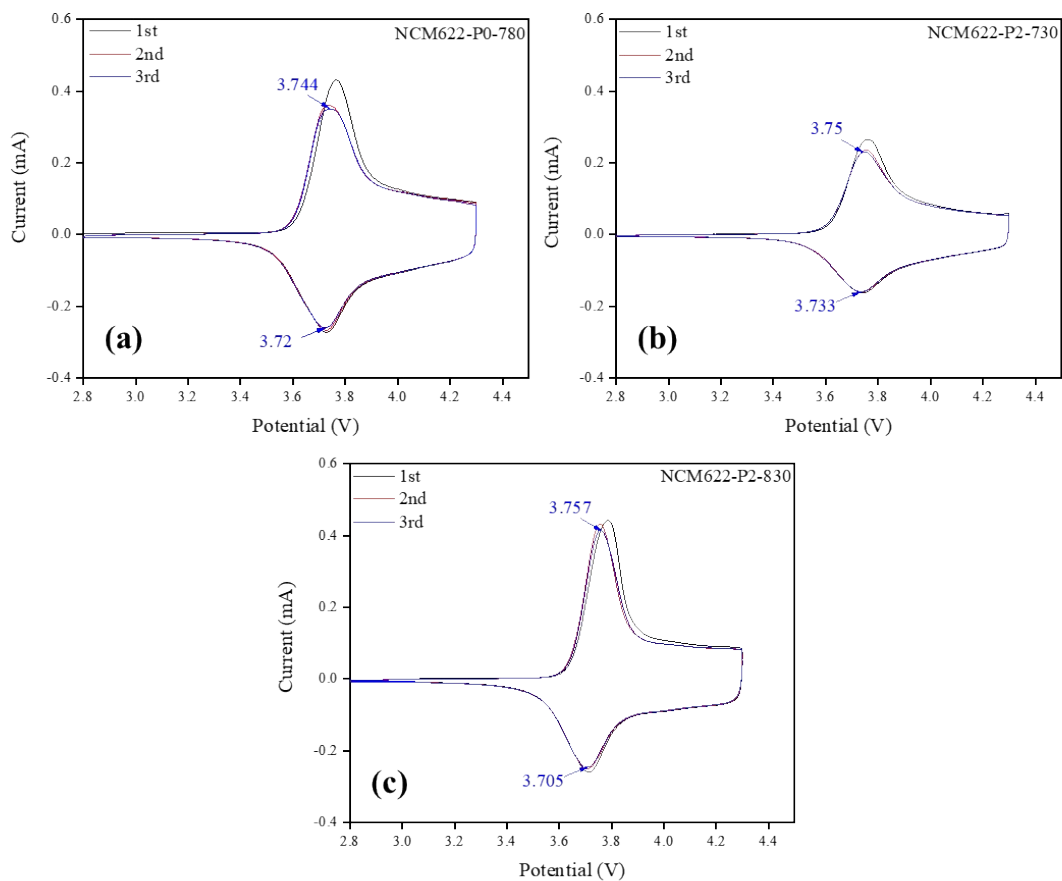

**Fig. S3.** CV curves of NCM622-P0-780, NCM622-P2-730 and NCM622-P2-830 at 0.1 mV/s.

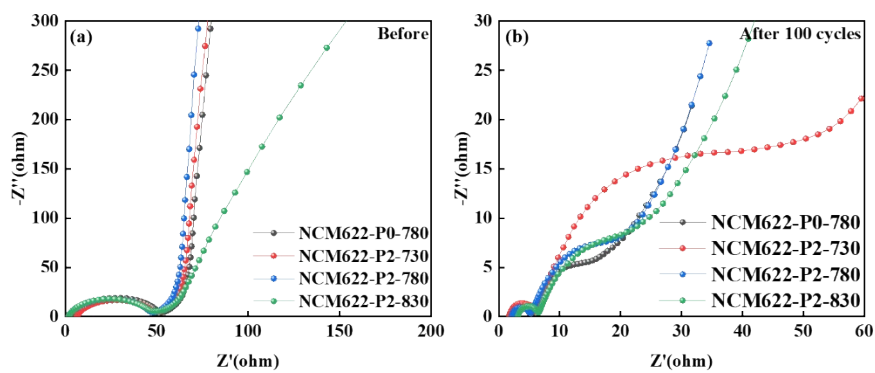

**Fig. S4.** Nyquist plots of the different NCM622 products.

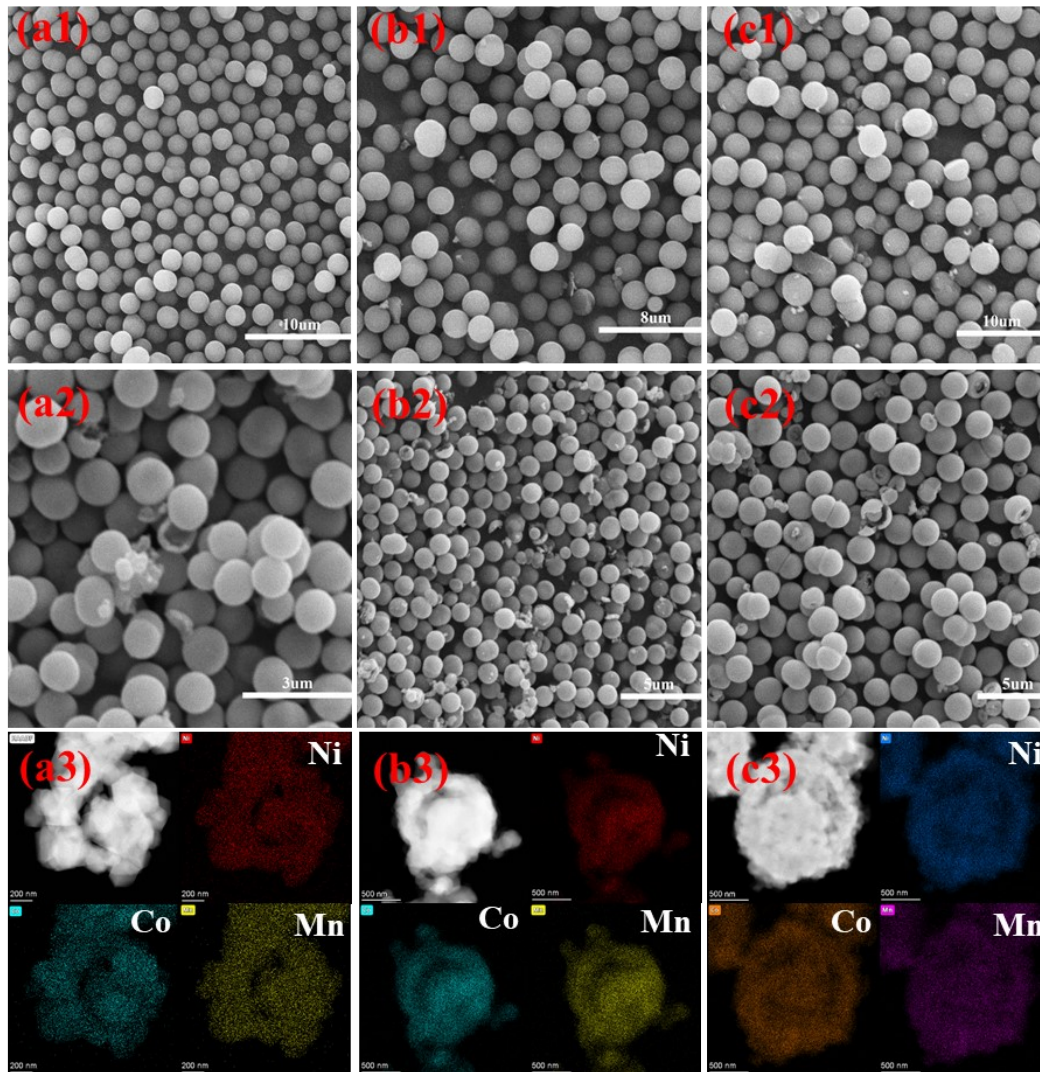

**Fig. S5.** (a1-2) SEM images of the NCM111 precursor (a1) and oxide (a2), and (a3) HAADF STEM image of the yolk-shelled NCM111 cathode with corresponding EDS maps of Ni/Co/Mn elements. (b1-2) SEM images of the NCM523 precursor (b1) and oxide (b2), and (b3) HAADF STEM image of the yolk-shelled NCM523 cathode with corresponding EDS maps of Ni/Co/Mn elements. (c1-2) SEM images of the NCM811 precursor (c1) and oxide (c2), and (c3) HAADF STEM image of the yolk-shelled NCM811 cathode with corresponding EDS maps of Ni/Co/Mn elements.

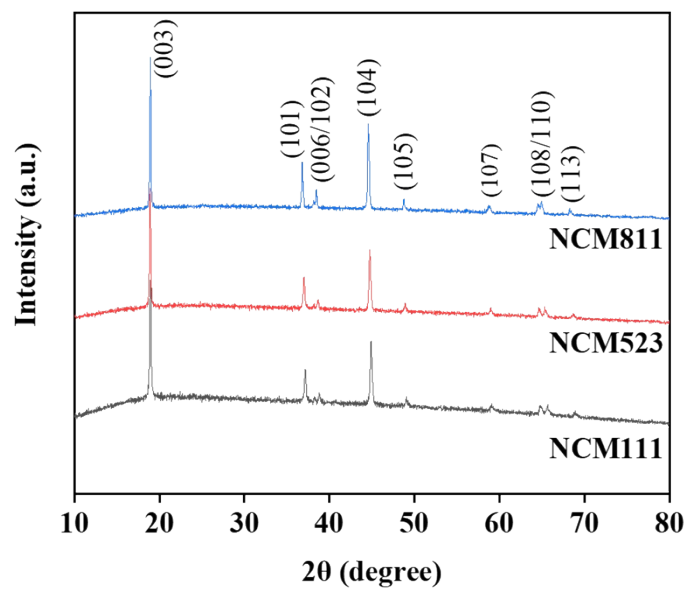

**Fig. S6.** XRD patterns of the NCM111, NCM523 and NCM811 products.

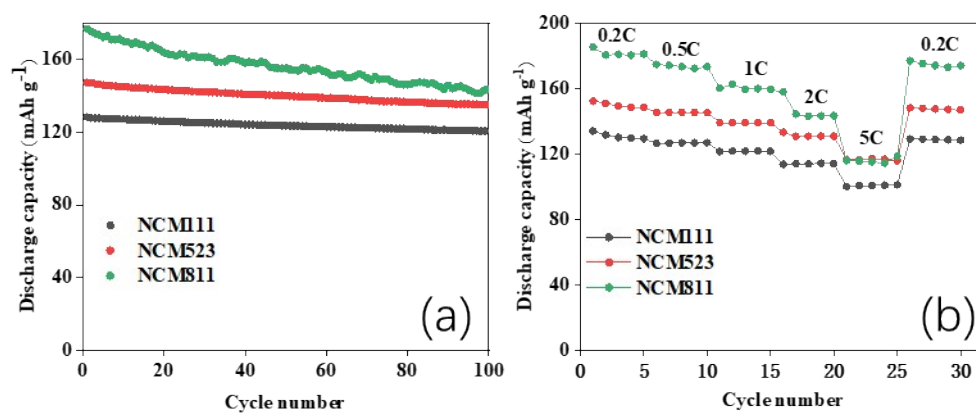

**Fig. S7.** (a) Cycle and (b) rate performances of the NCM111, NCM523 and NCM811 cathodes.

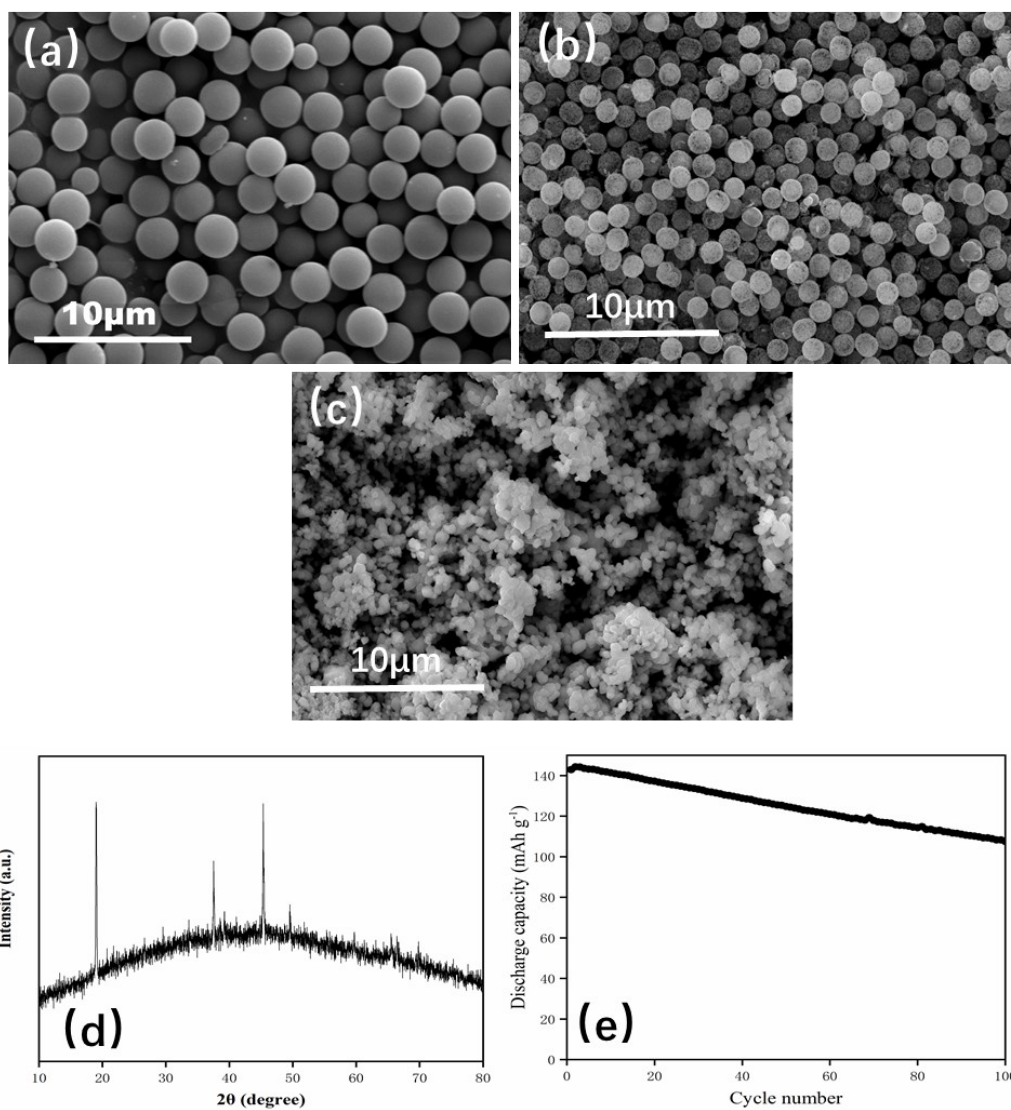

**Fig. S8.** (a-c) SEM images of the (a) Co-gluconate, (b) CoO<sub>x</sub> and (c) LiCoO<sub>2</sub>. (d) XRD pattern and (e) cycle performance of LiCoO<sub>2</sub> cathode.

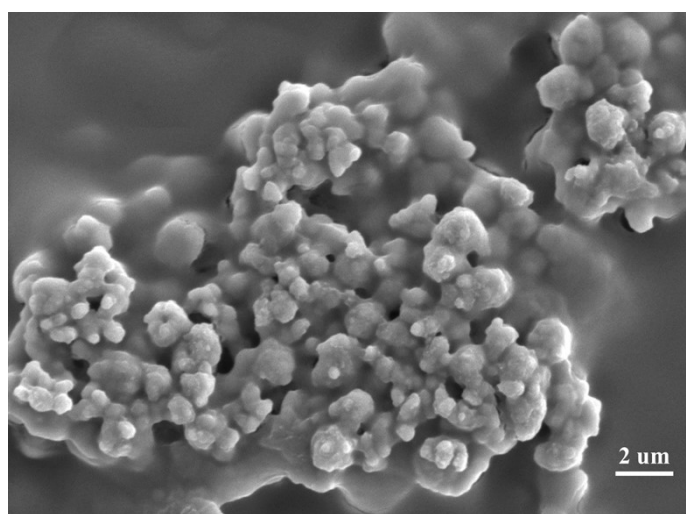

**Fig. S9.** SEM images of NCM622 electrode after the cycling test.

**Table S3.** Comparison of the electrochemical performances of various NCM622 cathodes.

| Literature   | Voltage range | 1 <sup>st</sup> discharge capacity                                 | Cycle number | Capacity retention                       |
|--------------|---------------|--------------------------------------------------------------------|--------------|------------------------------------------|
| This work    | 2.8-4.3V      | 179.5 mAh g <sup>-1</sup> (0.2C)<br>177.4 mAh g <sup>-1</sup> (1C) | 100(1C)      | 88.3% (177.4/156.7 mAh g <sup>-1</sup> ) |
| <sup>1</sup> | 2.8-4.3V      | 143 mAh g <sup>-1</sup> (1C)                                       | 100(1C)      | 87% (150/130.5 mAh g <sup>-1</sup> )     |
| <sup>2</sup> | 2.8-4.3V      | 152.0 mAh g <sup>-1</sup> (1C)                                     | 100(1C)      | 81.5% (123/100.7 mAh g <sup>-1</sup> )   |
| <sup>3</sup> | 2.8-4.3V      | 189.1 mAh g <sup>-1</sup> (0.1C)                                   | 100(1C)      | 96.5%(144.2/139.2 mAh g <sup>-1</sup> )  |
| <sup>4</sup> | 2.7-4.4V      | 165.1 mAh g <sup>-1</sup> (1C)                                     | 200(1C)      | 84.9%(165.1/140.1 mAh g <sup>-1</sup> )  |
| <sup>5</sup> | 2.8-4.4V      | 171.2 mAh g <sup>-1</sup> (0.5C)                                   | 300(0.5C)    | 99.7%(171.2/170.7 mAh g <sup>-1</sup> )  |
| <sup>6</sup> | 2.8-4.3V      | 153.8 mAh g <sup>-1</sup> (0.5C)                                   | 100(0.5C)    | 99.1%(153.8/152.4 mAh g <sup>-1</sup> )  |

### References.

1. Lee, S.-W.; Kim, H.; Kim, M.-S.; Youn, H.-C.; Kang, K.; Cho, B.-W.; Roh, K. C.; Kim, K.-B., Improved electrochemical performance of LiNi<sub>0.6</sub>Co<sub>0.2</sub>Mn<sub>0.2</sub>O<sub>2</sub> cathode material synthesized by citric acid assisted sol-gel method for lithium ion batteries. *Journal of Power Sources* **2016**, *315*, 261-268.
2. Ma, Y.; Li, L.; Wang, L.; Luo, R.; Xu, S.; Wu, F.; Chen, R., Effect of metal ion concentration in precursor solution on structure and electrochemical performance of LiNi<sub>0.6</sub>Co<sub>0.2</sub>Mn<sub>0.2</sub>O<sub>2</sub>. *Journal of Alloys and Compounds* **2019**, *778*, 643-651.
3. Xiaoxiao, Y.; Weitong, Y.; Junqi, P.; Xiaoying, L.; Qi, J.; Fangcheng, C.; Guoping, W., Preparation of LiNi<sub>0.6</sub>Co<sub>0.2</sub>Mn<sub>0.2</sub>O<sub>2</sub> by PVP modified liquid-phase assisted solid-phase method and its electrochemical energy storage performance. *Ceramics International* **2021**, *47* (21), 30266-30272.
4. Lu, Y.; Jin, H.; Mo, Y.; Qu, Y.; Du, B.; Chen, Y., Synthesis and characterization of Cu-doped LiNi<sub>0.6</sub>Co<sub>0.2</sub>Mn<sub>0.2</sub>O<sub>2</sub> materials for Li-ion batteries. *Journal of Alloys and Compounds* **2020**, *844*, 156180.
5. Meng, F.; Hu, R.; Chen, Z.; Tan, L.; Lan, X.; Yuan, B., Plasma assisted synthesis of LiNi<sub>0.6</sub>Co<sub>0.2</sub>Mn<sub>0.2</sub>O<sub>2</sub> cathode materials with good cyclic stability at subzero temperatures. *Journal of Energy Chemistry* **2021**, *56*, 46-55.
6. Wang, L.; Huang, B.; Xiong, W.; Tong, M. e.; Li, H.; Xiao, S.; Chen, Q.; Li, Y.; Yang, J., Improved solid-state synthesis and electrochemical properties of LiNi<sub>0.6</sub>Co<sub>0.2</sub>Mn<sub>0.2</sub>O<sub>2</sub> cathode materials for lithium-ion batteries. *Journal of Alloys and Compounds* **2020**, *844*, 156034.
